# Supplementary material for: Transition of young people from children’s into adults’ services: what works for whom and in what circumstances – protocol for a realist synthesis
Source: HighWire-hosted journal article supplement (doi:10.1136/bmjopen-2023-076649), 2024-01-01
Supplement: bmjopen-2023-076649supp004_data_supplement.pdf [file bmjopen-2023-076649supp004_data_supplement.pdf]

## Cochrane Search Strategy

Search Name: Cochrane 12th July

Date Run: 12/07/2022 15:48:01

Comment:

| ID  | Search                                                                                                                                                                                                                        | Hits    |
|-----|-------------------------------------------------------------------------------------------------------------------------------------------------------------------------------------------------------------------------------|---------|
| #1  | MeSH descriptor: [Adolescent] this term only                                                                                                                                                                                  | 110346  |
| #2  | MeSH descriptor: [Adolescent, Hospitalized] this term only                                                                                                                                                                    | 9       |
| #3  | MeSH descriptor: [Adolescent, Institutionalized] this term only                                                                                                                                                               | 1       |
| #4  | MeSH descriptor: [Young Adult] this term only                                                                                                                                                                                 | 72670   |
| #5  | MeSH descriptor: [Pediatrics] this term only                                                                                                                                                                                  | 675     |
| #6  | MeSH descriptor: [Parents] this term only                                                                                                                                                                                     | 3714    |
| #7  | MeSH descriptor: [Fathers] this term only                                                                                                                                                                                     | 223     |
| #8  | MeSH descriptor: [Mothers] this term only                                                                                                                                                                                     | 2193    |
| #9  | MeSH descriptor: [Single Parent] this term only                                                                                                                                                                               | 45      |
| #10 | MeSH descriptor: [Caregivers] this term only                                                                                                                                                                                  | 2582    |
| #11 | MeSH descriptor: [Family] this term only                                                                                                                                                                                      | 1619    |
| #12 | MeSH descriptor: [Health Personnel] this term only                                                                                                                                                                            | 1183    |
| #13 | MeSH descriptor: [Case Managers] this term only                                                                                                                                                                               | 16      |
| #14 | MeSH descriptor: [Health Educators] this term only                                                                                                                                                                            | 28      |
| #15 | MeSH descriptor: [Medical Staff] explode all trees                                                                                                                                                                            | 345     |
| #16 | MeSH descriptor: [Nurses] explode all trees                                                                                                                                                                                   | 1322    |
| #17 | MeSH descriptor: [Nursing Staff] explode all trees                                                                                                                                                                            | 684     |
| #18 | MeSH descriptor: [Personnel, Hospital] this term only                                                                                                                                                                         | 188     |
| #19 | MeSH descriptor: [Medical Staff, Hospital] this term only                                                                                                                                                                     | 278     |
| #20 | MeSH descriptor: [Nursing Staff, Hospital] this term only                                                                                                                                                                     | 466     |
| #21 | MeSH descriptor: [Physical Therapists] this term only                                                                                                                                                                         | 157     |
| #22 | MeSH descriptor: [Physicians] this term only                                                                                                                                                                                  | 1008    |
| #23 | MeSH descriptor: [General Practitioners] this term only                                                                                                                                                                       | 342     |
| #24 | MeSH descriptor: [Pediatricians] this term only                                                                                                                                                                               | 25      |
| #25 | MeSH descriptor: [Physicians, Family] this term only                                                                                                                                                                          | 462     |
| #26 | MeSH descriptor: [Physicians, Primary Care] this term only                                                                                                                                                                    | 177     |
| #27 | MeSH descriptor: [Psychotherapists] this term only                                                                                                                                                                            | 5       |
| #28 | MeSH descriptor: [Pharmacists] this term only                                                                                                                                                                                 | 721     |
| #29 | MeSH descriptor: [Occupational Therapists] this term only                                                                                                                                                                     | 11      |
| #30 | MeSH descriptor: [Social Workers] this term only                                                                                                                                                                              | 30      |
| #31 | MeSH descriptor: [Nutritionists] this term only                                                                                                                                                                               | 56      |
| #32 | MeSH descriptor: [Patients] this term only                                                                                                                                                                                    | 403     |
| #33 | MeSH descriptor: [Inpatients] this term only                                                                                                                                                                                  | 1100    |
| #34 | MeSH descriptor: [No-Show Patients] this term only                                                                                                                                                                            | 11      |
| #35 | MeSH descriptor: [Outpatients] this term only                                                                                                                                                                                 | 1388    |
| #36 | (young person* or young people* or adolescen* or teen* or youth* or young adult* or p?ediatric* or child*):ti,ab,kw                                                                                                           | 339085  |
| #37 | (patient*):ti,ab,kw                                                                                                                                                                                                           | 1076849 |
| #38 | (family or families or parent* or father* or mother* or carer* or caregiver* or care giver*):ti,ab,kw                                                                                                                         | 109119  |
| #39 | (doctor* or physician* or p?ediatrician* or general practitioner* or GP? or health care professional* or healthcare professional* or health care personnel* or healthcare personnel* or clinician* or case manager*):ti,ab,kw | 112066  |

- #40 (nurs\* or occupational therapist\* or pharmacist\* or physiotherapist\* or physical therapist\* or psychotherapist\* or psychologist\* or psychiatrist\* or dietician\* or nutritionist\* or social worker\*):ti,ab,kw 68463
- #41 (youth worker\* or transition champion\* or transition coordinator\* or transition co-ordinator\*):ti,ab,kw 279
- #42 {OR #1-#41} 1306481
- #43 MeSH descriptor: [Hospitals] explode all trees 3996
- #44 MeSH descriptor: [Primary Health Care] explode all trees 8394
- #45 MeSH descriptor: [Adolescent Health Services] this term only 177
- #46 (hospital\* or hospice\* or primary care\* or primary health care\* or primary healthcare\* or secondary care\* or secondary health care\* or secondary healthcare\* or tertiary care\* or tertiary health care\* or tertiary healthcare\* or NHS or national health service):ti,ab,kw 291726
- #47 {OR #43-#46} 292877
- #48 MeSH descriptor: [Transition to Adult Care] this term only 25
- #49 MeSH descriptor: [Transitional Care] this term only 83
- #50 (transition\*):ti,ab,kw 11635
- #51 {OR #48-#50} 11635
- #52 MeSH descriptor: [Perception] this term only 1684
- #53 MeSH descriptor: [Attitude] this term only 1188
- #54 MeSH descriptor: [Attitude of Health Personnel] this term only 2024
- #55 MeSH descriptor: [Attitude to Health] explode all trees 37736
- #56 MeSH descriptor: [Catastrophization] this term only 201
- #57 (perception\* or experience\* or perspective\* or challenge\* or information need\* or support need\* or barrier\* or facilitator\* or attitude\* or expectation\* or opinion\* or satisfaction\* or view\* or empowerment or shared decision-making):ti,ab,kw 306622
- #58 {OR #52-#57} 319149
- #59 #42 AND #47 AND #51 AND #58 with Publication Year from 2014 to 2022, in Trials 1403
