# Supplementary material for: Transition of young people from children’s into adults’ services: what works for whom and in what circumstances – protocol for a realist synthesis
Source: HighWire-hosted journal article supplement (doi:10.1136/bmjopen-2023-076649), 2024-01-01
Supplement: bmjopen-2023-076649supp006_data_supplement.pdf [file bmjopen-2023-076649supp006_data_supplement.pdf]

## OVID MEDLINE(R) ALL Search Strategy &lt;1946 to July 11, 2022&gt;

- 1 Adolescent/ or adolescent, hospitalized/ or adolescent, institutionalized/ or Young Adult/ or Pediatrics/ 2686951
- 2 parents/ or fathers/ or mothers/ or single parent/ 132227
- 3 Caregivers/ 46292
- 4 Family/ 82752
- 5 health personnel/ or case managers/ or health educators/ or exp medical staff/ or exp nurses/ or exp nursing staff/ or personnel, hospital/ or medical staff, hospital/ or nursing staff, hospital/ or physical therapists/ or physicians/ or general practitioners/ or pediatricians/ or physicians, family/ or physicians, primary care/ or psychotherapists/ 377568
- 6 Pharmacists/ 20407
- 7 Occupational Therapists/ 566
- 8 Social Workers/ 961
- 9 Nutritionists/ 1633
- 10 patients/ or inpatients/ or no-show patients/ or outpatients/ 66921
- 11 (young person\* or young people\* or adolescen\* or teen\* or youth\* or young adult\* or p?ediatric\* or child\*).ti,ab,kf. 2085766
- 12 patient\*.ti,ab,kf. 7648258
- 13 (family or families or parent\* or father\* or mother\* or carer\* or caregiver\* or care giver\*).ti,ab,kf. 1701694
- 14 (doctor\* or physician\* or p?ediatrician\* or general practitioner\* or GP? or health care professional\* or healthcare professional\* or health care personnel\* or healthcare personnel\* or clinician\* or case manager\*).ti,ab,kf. 1031087
- 15 (nurs\* or occupational therapist\* or pharmacist\* or physiotherapist\* or physical therapist\* or psychotherapist\* or psychologist\* or psychiatrist\* or dietician\* or nutritionist\* or social worker\*).ti,ab,kf. 614580
- 16 (youth worker\* or transition champion\* or transition coordinator\* or transition co-ordinator\*).ti,ab,kf. 186
- 17 1 or 2 or 3 or 4 or 5 or 6 or 7 or 8 or 9 or 10 or 11 or 12 or 13 or 14 or 15 or 16 11799493
- 18 exp Hospitals/ 305779
- 19 exp Primary Health Care/ 184156
- 20 Adolescent health services/ 5844

- 21 (hospital\* or hospice\* or primary care\* or primary health care\* or primary healthcare\* or secondary care\* or secondary health care\* or secondary healthcare\* or tertiary care\* or tertiary health care\* or tertiary healthcare\* or NHS or national health service).ti,ab,kf. 1733153
- 22 18 or 19 or 20 or 21 1905305
- 23 transition to adult care/ or transitional care/ 3048
- 24 transition\*.ti,ab,kf. 484217
- 25 23 or 24 484546
- 26 17 and 22 and 25 20543
- 27 Perception/ 41631
- 28 attitude/ or "attitude of health personnel"/ or exp attitude to health/ or catastrophization/ 613115
- 29 (perception\* or experience\* or perspective\* or challenge\* or information need\* or support need\* or barrier\* or facilitator\* or attitude\* or expectation\* or opinion\* or satisfaction\* or view\* or empowerment or shared decision-making).ti,ab,kf. 3588560
- 30 27 or 28 or 29 3906756
- 31 26 and 30 10276
- 32 limit 31 to (yr="2014 -Current" and "humans only (removes records about animals)") 7083
