# Supplementary material for: Transition of young people from children’s into adults’ services: what works for whom and in what circumstances – protocol for a realist synthesis
Source: HighWire-hosted journal article supplement (doi:10.1136/bmjopen-2023-076649), 2024-01-01
Supplement: bmjopen-2023-076649supp009_data_supplement.pdf [file bmjopen-2023-076649supp009_data_supplement.pdf]

## Scopus search strategy 12.7.22

```
(( TITLE-ABS-KEY ( "young person*" OR "young
people*" OR adolescen* OR teen* OR youth* OR "young
adult*" OR pediatric* OR paediatric* OR child* ) OR TITLE-ABS-
KEY ( ( patient* ) ) OR TITLE-ABS-
KEY ( ( family OR families OR parent* OR father* OR mother* OR carer* OR
caregiver* OR "care giver*" ) ) OR TITLE-ABS-
KEY ( ( doctor* OR physician* OR pediatrician* OR paediatrician* OR "general
practitioner*" OR gp OR gps OR "health care professional*" OR "healthcare
professional*" OR "health care personnel*" OR "healthcare
personnel*" OR clinician* OR "case manager*" ) ) OR TITLE-ABS-
KEY ( ( nurs* OR "occupational
therapist*" OR pharmacist* OR physiotherapist* OR "physical
therapist*" OR psychotherapist* OR psychologist* OR psychiatrist* OR dietician
* OR nutritionist* OR "social worker*" ) ) OR TITLE-ABS-KEY ( ( "youth
worker*" OR "transition champion*" OR "transition coordinator*" OR "transition
co-ordinator*" ) ) ) ) AND ( TITLE-ABS-
KEY ( ( hospital* OR hospice* OR "primary care*" OR "primary health
care*" OR "primary healthcare*" OR "secondary care*" OR "secondary health
care*" OR "secondary healthcare*" OR "tertiary care*" OR "tertiary health
care*" OR "tertiary healthcare*" OR nhs OR "national health
service" ) ) ) AND ( TITLE-ABS-KEY ( transition* ) ) AND ( TITLE-ABS-
KEY ( ( perception* OR experience* OR perspective* OR challenge* OR "infor
mation need*" OR "support
need*" OR barrier* OR facilitator* OR attitude* OR expectation* OR opinion*
OR satisfaction* OR view* OR empowerment OR "shared decision-
making" ) ) ) AND ( LIMIT-TO ( PUBYEAR , 2022 ) OR LIMIT-
TO ( PUBYEAR , 2021 ) OR LIMIT-TO ( PUBYEAR , 2020 ) OR LIMIT-
TO ( PUBYEAR , 2019 ) OR LIMIT-TO ( PUBYEAR , 2018 ) OR LIMIT-
TO ( PUBYEAR , 2017 ) OR LIMIT-TO ( PUBYEAR , 2016 ) OR LIMIT-
TO ( PUBYEAR , 2015 ) OR LIMIT-TO ( PUBYEAR , 2014 ) )
```
